# Supplementary material for: Systematic and integrative analysis of large gene lists using DAVID bioinformatics resources
Source: Springer Nature journal article supplement (doi:10.1038/nprot.2008.211), 2008-12-18

# Enrichment P-value Distributions: 'good' gene lists vs. random gene lists

## Description

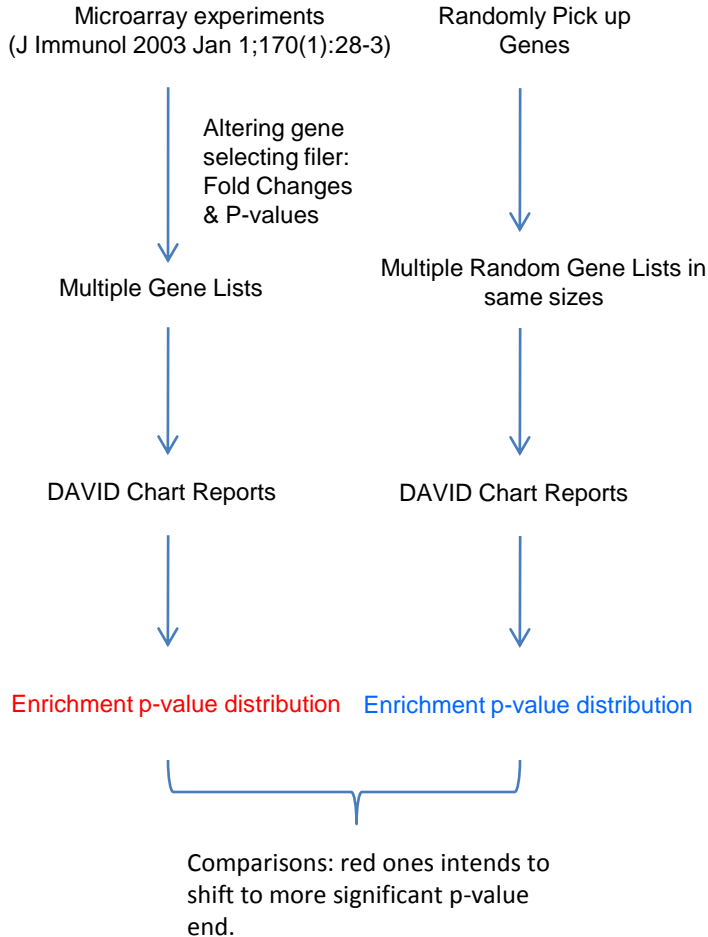

## Results

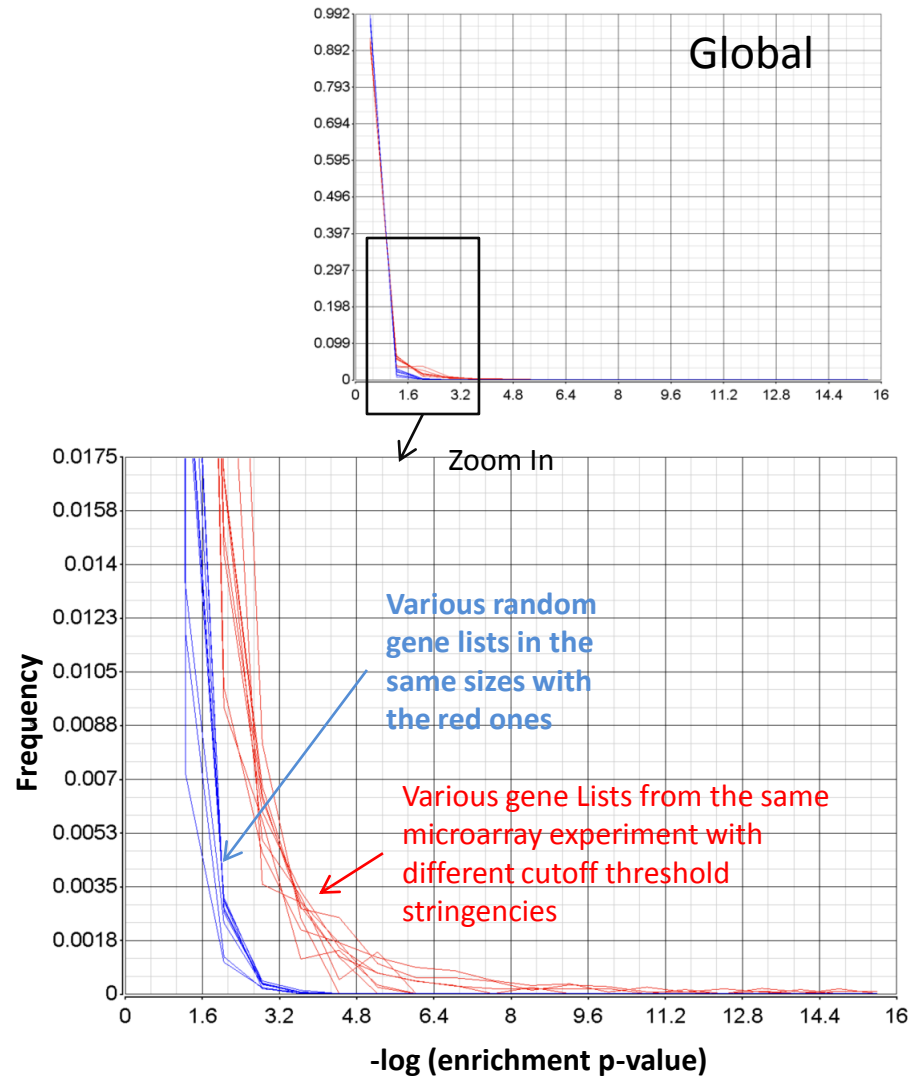

Supplement: 41596_2009_BFnprot2008211_MOESM199_ESM.pdf [file 41596_2009_BFnprot2008211_MOESM199_ESM.pdf]
