# Supplementary material for: Systematic and integrative analysis of large gene lists using DAVID bioinformatics resources
Source: Springer Nature journal article supplement (doi:10.1038/nprot.2008.211), 2008-12-18
Supplement: 41596_2009_BFnprot2008211_MOESM202_ESM.pdf [file 41596_2009_BFnprot2008211_MOESM202_ESM.pdf]

# Input Format of Gene IDs

## Option A:

31741\_at  
31734\_at  
32696\_at  
37559\_at  
41400\_at  
35985\_at  
39304\_g\_at  
41438\_at  
35067\_at  
32919\_at  
35429\_at  
36674\_at  
967\_g\_at  
36669\_at  
39242\_at  
39573\_at  
39407\_at  
33346\_r\_at  
40319\_at  
2043\_s\_at  
1788\_s\_at

## Option B:

39573\_at,39407\_at,33346\_r\_at,40319\_at,2043\_s\_at,1788\_s\_at,36651\_at,41788\_i\_at,35595\_at,36285\_at,39586\_at,35160\_at,  
39424\_at,36865\_at,2004\_at,36728\_at,37218\_at,40347\_at,36226\_r\_at,33012\_at,37906\_at,32872\_at,989\_at,32718\_at,36957\_  
at,32645\_at,
